# Supplementary material for: Seroprevalence of brucellosis in small ruminants and related risk behaviours among humans in different husbandry systems in Mali
Source: PubMed Central journal article supplement (PMC7822284; doi:10.1371/journal.pone.0245283), 2021-01-22
Supplement: pone.0245283.s001.pdf [file pone.0245283.s001.pdf]

**FREE AND INFORMED ASSENT FORM**

**Project title : Role of small ruminant husbandry systems in the transmission of brucellosis to animals and humans in Mali.**

**Declaration of the minor's tutor:**

In my capacity as legal representative, I have read and understood the contents of this form. I certify that it was explained to me verbally. I had the opportunity to ask all my questions and they were answered to my satisfaction. I know that I am free to accept that my child (or the person I represent) participate in the project just as I am free to withdraw him (her) from the project at any time, by verbal notice, without prejudice. I certify that we have been given sufficient time to make our decision. I also certify that my child (or the person I represent) does not object. I will receive a signed and dated copy of this form. I, the undersigned, consent to my child (or the person I represent) participating in the project.

Name of parent or legal tutor : \_\_\_\_\_

Place : \_\_\_\_\_ Date : \_\_\_\_\_ Signature : \_\_\_\_\_

Name of minor : \_\_\_\_\_

Place : \_\_\_\_\_ Date : \_\_\_\_\_ Signature : \_\_\_\_\_

Name of witness if applicable : \_\_\_\_\_

Place : \_\_\_\_\_ Date : \_\_\_\_\_ Signature : \_\_\_\_\_

----- Thank you for your participation ! -----

---

**FREE AND INFORMED ASSENT FORM**

**Project title : Role of small ruminant husbandry systems in the transmission of brucellosis to animals and humans in Mali.**

**Declaration of the minor's tutor:**

In my capacity as legal representative, I have read and understood the contents of this form. I certify that it was explained to me verbally. I had the opportunity to ask all my questions and they were answered to my satisfaction. I know that I am free to accept that my child (or the person I represent) participate in the project just as I am free to withdraw him (her) from the project at any time, by verbal notice, without prejudice. I certify that we have been given sufficient time to make our decision. I also certify that my child (or the person I represent) does not object. I will receive a signed and dated copy of this form. I, the undersigned, consent to my child (or the person I represent) participating in the project.

Name of parent or legal tutor : \_\_\_\_\_

Place : \_\_\_\_\_ Date : \_\_\_\_\_ Signature : \_\_\_\_\_

Name of minor : \_\_\_\_\_

Place : \_\_\_\_\_ Date : \_\_\_\_\_ Signature : \_\_\_\_\_

Name of witness if applicable : \_\_\_\_\_

Place : \_\_\_\_\_ Date : \_\_\_\_\_ Signature : \_\_\_\_\_

----- Thank you for your participation ! -----
