# Supplementary material for: Seroprevalence of brucellosis in small ruminants and related risk behaviours among humans in different husbandry systems in Mali
Source: PubMed Central journal article supplement (PMC7822284; doi:10.1371/journal.pone.0245283), 2021-01-22
Supplement: pone.0245283.s003.pdf [file pone.0245283.s003.pdf]

# Questionnaire sur le cheptel et les comportements à risque

Merci de nous accorder un peu de votre temps afin de répondre à nos questions

1. Number

2. Date

3. Region

1. Bamako  2. Sikasso  3. Segou

4. Locality

5. GPS coordinates

## Identification of the respondent

6. What is your name please ?

7. What age group are you in?

1. [0 18]  2. [18 25]  3. [25 45]  4. [45 ..[

8. Gender

1. Male  2. female

9. What is your marital status?

1. Single  2. Married  3. Widower  4. Divorced

10. Are you educated

1. yes  2. no

11. If yes, what type of school did you attend ?

1. Koranic  2. French  3. Local

*La question n'est pertinente que si Alphanetisation = "yes"*

12. What is your education level ?

1. Basic  2. Secondary  3. High

*La question n'est pertinente que si Alphanetisation = "yes"*

13. What is your main professional activity?

1. Breeding  2. Agriculture  3. Other

14. If other activity specify ?

*La question n'est pertinente que si Activite = "Other"*

## Characterization of the farm

15. How far is the farm from the main urban center?

1. [0 24]  2. [25 50]  3. [50 ..[

16. Do you own a herd of?

1. ovine  2. Caprine  3. Ovine+caprine

17. Are there other species besides small ruminants?

1. yes  2. no

18. If yes which?

1. ovine  2. Poultry  3. Equidae  
 4. pigs  5. Others

*Vous pouvez cocher plusieurs cases (4 au maximum).*

*La question n'est pertinente que si Autre\_espèces = "yes"*

19. Do the animals live in an enclosure?

1. yes  2. no

20. If yes what kind of material is the enclosure made of?

1. cement  2. Banco  3. wood  4. fences  
 5. Iron bar  6. Stake

*La question n'est pertinente que si Enclos = "yes"*

21. How did you acquire your herd ?

1. Purchase  2. Don  3. Heritage

22. Is the herd in?

1. Unique  2. Mixed

23. What is the goal of your breeding?

1. Milk  2. Fattening  3. Prestige  4. Income

24. How many heads do you think you have?

25. Alimentation mode ?

1. Give all  2. Just\_supplement  3. Only grazing

26. Medical care for animals ?

1. Nothing  2. Maladie  3. regularly

27. Do your animals movements

1. yes  2. no

28. If yes, how would you describe the movements of your herd?

1. Daily  2. Seasonal  3. annual

*La question n'est pertinente que si Deplacement = "yes"*

29. What are your reasons for moving the herd?

1. Pature  2. vaccination  3. other

*La question n'est pertinente que si Deplacement = "yes"*

30. If other, specify ?

*La question n'est pertinente que si Raison\_deplacement = "other"*

**31. Does your herd come into contact with other herds?**

1. yes  2. no

## Risk behaviors

**32. Are you in constant contact with your animals?**

1. yes  2. no

**33. If so, what is the level of proximity to animals?**

1. Sleep with animal  2. Enclosure\_in\_concession  
 3. Animal\_around\_house  4. Milked  
 5. Treatments  6. Grazing

*Vous pouvez cocher plusieurs cases (3 au maximum).*

*La question n'est pertinente que si Contact\_permanent = "yes"*

**34. What breeding method (s) do you use?**

1. SN  2. IA  3. SN+IA

**35. If natural rearing, do you trade breeding males with other farms?**

1. yes  2. no

*La question n'est pertinente que si Reproduction = "SN"*

**36. Are your animals milked?**

1. yes  2. no

**37. If so, what method of milking do you use?**

1. Manual  2. Mechanical

*La question n'est pertinente que si Traite = "yes"*

**38. If manual, how are the hands of the person milking the animals?**

1. With gloves  2. Without gloves

*La question n'est pertinente que si Methode\_Traite = "Manual"*

**39. What do you do with the collected milk?**

1. Consumes  2. Sold  3. Share

*Vous pouvez cocher plusieurs cases.*

*La question n'est pertinente que si Traite = "yes"*

**40. If consumed, in what state do you consume this milk?**

1. Raw  2. Boiled  3. Fermented

*La question n'est pertinente que si Lait\_recueilli = "Consumes"*

**41. Do you assist the females during calving?**

1. Yes  2. no

**42. If yes, How are the hands of the person helping the animals to give birth?**

1. With gloves  2. Without gloves

*La question n'est pertinente que si Aide\_mise\_bas = "Yes"*

**43. What do you do with the placentas?**

1. Away  2. Bury  3. Burn  4. Others

**44. If other, specify?**

*La question n'est pertinente que si Gestion\_Placentas = "Others"*

**45. Do you have any cases of hygromas in your herd?**

1. yes  2. no

**46. If yes, what do you do with these animals**

1. Solde  2. Keep  3. slaughter

*La question n'est pertinente que si Hygrograma = "yes"*

**47. Do you have any cases of abortions in your herd?**

1. yes  2. no

**48. If so, what do you do with these animals?**

1. Solde  2. Keep  3. slaughter

*La question n'est pertinente que si Avortements = "yes"*

**49. If yes, how do you deal with abortions?**

1. Away  2. Bury  3. To dogs  4. Others

*La question n'est pertinente que si Avortements = "yes"*
