# Supplementary material for: Seroprevalence of brucellosis in small ruminants and related risk behaviours among humans in different husbandry systems in Mali
Source: PubMed Central journal article supplement (PMC7822284; doi:10.1371/journal.pone.0245283), 2021-01-22
Supplement: pone.0245283.s004.pdf [file pone.0245283.s004.pdf]

# Questionnaire sur le cheptel et les comportements à risque

Merci de nous accorder un peu de votre temps afin de répondre à nos questions

1. Numero de fiche

2. Date

3. Région

1. Bamako  2. Sikasso  3. Segou

4. Localité

5. Coordonnées Geographique

## Identification de l'enquête

6. Quel est votre nom ?

7. Dans quelle tranche d'âge vous situez vous ?

1. Moins de 18 ans  2. De 18 à 25 ans  
 3. De 25 à 45 ans  4. Plus de 45 ans

8. Genre

1. Masculin  2. Féminin

9. Quelle est votre situation matrimoniale ?

1. Célibataire  2. Marié(e)  3. Veuf(ve)  
 4. Divorcé(e)

10. Etes vous instruit(e)

1. oui  2. non

11. Si oui, Quelle type d'école avez vous fréquenté

1. Ecole coranique  2. Ecole française  
 3. Langue locale

*La question n'est pertinente que si Alphabétisation = "oui"*

12. Quel est votre niveau d'étude

1. Basique  2. Moyen  3. Elevé

*La question n'est pertinente que si Alphabétisation = "oui"*

13. Quelle est votre activité professionnelle principale ?

1. Elevage  2. Agriculture  3. Autre

14. Si autre activité précisez

## Caracterisation de l'élevage

15. L'élevage est à quelle distance du principal centre urbain

1. Entre 0 - 24 Km  2. Entre 25 - 50 Km  
 3. Au-delà de 50 Km

16. Vous possédez un troupeau de

1. Ovins  2. Caprins  3. Ovins+Caprins

17. Il y a d'autres espèces en plus des petits ruminants ?

1. oui  2. non

18. Si oui lesquelles ?

1. Bovins  2. volaille  3. Equidés  
 4. porcins  5. autres

*Vous pouvez cocher plusieurs cases (4 au maximum).*

19. Comment avez vous acquis votre troupeau

1. Achat  2. Don  3. Héritage

20. Le troupeau est il en ?

1. Propriété unique  2. Propriété mixte

21. Quelle est le but de votre élevage

1. Production laitière  2. Embouche  
 3. Elevage de prestige  4. Activité culturelle

*Vous pouvez cocher plusieurs cases (3 au maximum).*

22. Combien de têtes estimez-vous posséder ?

23. Mode d'alimentation

1. Donne tout le nécessaire aux animaux sur place  
 2. Donne juste des suppléments aux animaux  
 3. Animaux amenés sur le pâturage

24. Soins médicaux apportés aux animaux

1. N'apporte pas de soins  
 2. Seulement en cas de maladie  
 3. Suivi régulier par un professionnel de la santé animale

*Vous pouvez cocher plusieurs cases.*

25. Est ce que vos animaux effectuent des déplacements

1. Oui  2. Non

26. Si oui, Comment décririez-vous les mouvements de votre troupeau ?

1. Aller-retour dans la même journée  
 2. Longue distance parcourue au gré des saisons  
 3. Mouvement tout au long de l'année

*La question n'est pertinente que si Mouvement aniamux = "Oui"*

**27. Pour quelles raisons déplacez vous le troupeau ?**

- 1. Recherche de pâturage et d'eau
- 2. Campagne de vaccination
- 3. Rencontre annuelles
- 4. Autre

**28. Si autre précisez**

**29. Ces déplacements ont lieu à quelle période de l'année ?**

- 1. Saison sèche froide
- 2. Saison sèche chaude
- 3. Saison pluvieuse

**30. Votre troupeau rentre t'il en contact avec d'autres troupeau ?**

- 1. oui
- 2. non

**31. Si oui, quel type de contact ?**

- 1. Sur pâturage
- 2. Sur les points d'abreuvement
- 3. Dans les parcs de vaccination
- 4. En confiant la garde du troupeau
- 5. Pendant les prêts d'animaux

*Vous pouvez cocher plusieurs cases (3 au maximum).*

**Comportements à risque**

**32. Êtes-vous en contact permanent avec vos animaux ?**

- 1. oui
- 2. non

**33. Si oui; quelle est le niveau de proximité avec les animaux**

- 1. Dort avec les animaux
- 2. Enclos dans la concession
- 3. Animaux dispersés autour de la maison
- 4. lors de la traite
- 5. pendant les soins
- 6. lors de la conduite de animaux

*Vous pouvez cocher plusieurs cases (3 au maximum).*

**34. Quelle(s) méthode(s) de reproduction utilisez-vous**

- 1. saillie naturelle
- 2. Insémination Artificielle
- 3. saillie naturelle + Insémination artificielle

**35. Si monte naturelle, est-ce que vous faites des échanges de males reproducteurs avec d'autres fermes ?**

- 1. oui
- 2. non

**36. Est ce que vos animaux sont traités**

- 1. Oui
- 2. non

**37. Si oui, quelle méthode de traite utilisez vous ?**

- 1. manuelle
- 2. mécanique

*La question n'est pertinente que si traite = "Oui"*

**38. Si manuelle, comment sont les mains de la personne qui trait les animaux ?**

- 1. Avec gants
- 2. sans gants

**39. Que faites vous du lait recueilli**

- 1. Consomme
- 2. vend
- 3. partage

**40. Si consommé, dans quel état consommez vous ce lait ?**

- 1. consommé cru
- 2. bouilli avant
- 3. fermenté avant

**41. Assistez-vous les femelles pendant les mises bas ?**

- 1. oui
- 2. non

**42. Comment sont les mains de la personne qui aide les animaux à mettre bas ?**

- 1. Gantée
- 2. Non Gantée

**43. Que faites-vous du placentas ?**

- 1. Jetter hors ferme
- 2. Enterrer
- 3. Bruler
- 4. Autre

*Vous pouvez cocher plusieurs cases (3 au maximum).*

**44. Si autres, précisez**

**45. Avez-vous des cas d'hygromas dans votre troupeau ?**

- 1. Oui
- 2. Non

**46. Si oui que faites-vous de ces animaux**

- 1. Vendre
- 2. garder
- 3. abattre

**47. Avez-vous des cas d'avortements dans votre troupeau ?**

- 1. Oui
- 2. Non

**48. Si oui que faites-vous de ces animaux ?**

- 1. Vendre
- 2. garder
- 3. Abattre

**49. Si oui, comment gérez-vous les avortons ?**

- 1. On les jette
- 2. On les enterre
- 3. On les laisse aux chiens
- 4. Autre

*La question n'est pertinente que si Avortements = "Oui"*
